# Supplementary material
Source: publisher figshare collection journal article supplement (https://frontiersin.figshare.com/ndownloader/files/23867558)
Supplement: Supplementary file 1 [file 23867558]

## Sheet: Hoja1
Cruise	Station	Latitude	Longitude	Bottle	Depth [m]	dMn [nmol kg-1]	Error dMn [nmol kg-1]	dFe [nmol kg-1]	Error dFe [nmol kg-1]
HERMINE	1	315.625	23.2571	24	10
				23	29.752	1.4822	0.0777	1.4364	0.0349
				22	30.053	1.3952	0.0732	1.1223	0.0273
				21	99.705	1.4346	0.0752	1.6004	0.0389
				20	150.293	0.00882	0.00046249	0.1495	0.0036383
				19	200.3	0.3684	0.0193	1.0879	0.0265
				18	420.762	0.1585	0.0083095	0.9009	0.0219
				17	950.542	0.0182	0.00095171	0.2233	0.0054318
				16	1302.18	0.1514	0.0079393	0.7579	0.0184
				15	1652.27
				14	2003.94	0.2042	0.0107	0.9614	0.0234
				13	2202.88	0.163	0.0085486	0.8847	0.0215
				12	2403.48	0.2116	0.0111	0.9022	0.0219
				11	2604.3	0.2073	0.0109	1.0943	0.0266
				10	2804.64
				9	2999.41	0.821	0.043	2.3078	0.0561
				8	3025.44
				7	3039.22	0.3041	0.0159	1.2366	0.0301
				6	3064.73	0.0104	0.00054271	0.1272	0.0030941
				5	3093.96	0.2125	0.0111	1.1894	0.0289
				4	3123.32
				3	3149.09
				2	3172.02	0.3641	0.0191	1.4479	0.0352
				1	3172.56	0.2809	0.0147	1.9415	0.0472
HERMINE	2	314.78	25.56	24	30.677	0.0016	3.5405e-05	0.5724	0.0056514
				23	100.541	0.00133	2.9431e-05	0.3917	0.0038677
				22	400.807	0.1582	0.0035009	0.4953	0.0048899
				21	601.579	0.0468	0.0010358	0.3809	0.0037605
				20	801.242
				19	1001.82	0.1436	0.0031776	0.7244	0.0071528
				18	1253.15	0.1459	0.0032274	0.7209	0.0071174
				17	1502.89	0.1475	0.0032646	0.6794	0.0067081
				16	2002.81	0.2041	0.0045157	0.9059	0.0089449
				15	2503.79	0.00265	5.864e-05	0.0947	0.00093464
				14	3005.11
				13	3204.98	0.00433	9.5815e-05	0.1086	0.0010719
				12	3254.68	0.2802	0.0061997	1.042	0.0103
				11	3303.43	0.2699	0.0059726	1.008	0.01
				10	3351.36	0.0909	0.0020123	0.5963	0.0058878
				9	3354.57	0.4294	0.0095019	1.0542	0.0104
				8	3405.61	0.2942	0.0065108	1.5596	0.0154
				7	3455.77	0.2365	0.0052322	0.9217	0.0091009
				6	3455.86	0.242	0.0053539	0.9227	0.0091102
				5	3505.62	0.2328	0.0051506	0.9375	0.0092561
				4	3555.84	0.3059	0.0067699	1.6507	0.0163
				3	3605.51	0.2421	0.0053579	1.0848	0.0107
				2	3740.45	0.2394	0.0052971	0.9476	0.0093562
				1	3743.29	0.2544	0.0056294	1.0531	0.0104
HERMINE	3	315.174	26.1372	24	29.824	1.4184	0.0314	0.7386	0.032
				23	451.074
				22	898.246	0.1264	0.0078346	0.9178	0.0397
				21	1251.49	0.1541	0.0095462	1.1248	0.0487
				20	2252.14	0.1825	0.0113	1.2166	0.0527
				19	2803.81	0.1623	0.0127	1.5086	0.0641
				18	3005.02	0.3221	0.0252	2.4019	0.1021
				17	3052.7	0.4601	0.036	2.7093	0.1152
				16	3104.33	0.994	0.0777	6.0002	0.2551
				15	3154.45	5.1976	0.4064	14.7829	0.6285
				14	3204.17	35.6096	2.7843	51.0947	2.1722
				13	3254.83	26.6584	2.0844	21.838	0.9284
				12	3304.58	28.0492	2.1932	21.1376	0.8986
				11	3354.36	26.9088	2.104	36.1755	1.5379
				10	3404.72	21.7255	1.6987	24.9484	1.0606
				9	3455.32	18.7329	1.4647	33.821	1.4378
				8	3480.26	14.6854	1.1483	32.3314	1.3745
				7	3505.36	14.2807	1.1166	32.9731	1.4018
				6	3529.81	12.5524	0.9815	33.5459	1.4262
				5	3554.98	9.8243	0.7682	31.851	1.3541
				4	3579.72	0.1435	0.0112	1.8302	0.0778
				3	3605.38	71.2157	5.5684	32.0621	1.3631
				1	3626.14	1.0126	0.0792	6.0357	0.2566
				2	3626.31	0.0391	0.0030557	1.5674	0.0666
HERMINE	4	315.171	26.1333	24	30.579	1.6314	0.1011	14.3203	0.6198
				23	129.365	1.0469	0.0649	0.7858	0.034
				22	220.806	0.1567	0.009711	0.6996	0.0303
				21	751.776	0.1314	0.0081426	0.7774	0.0336
				20	1002.4	0.137	0.0084903	1.1939	0.0517
				19	1252.29	0.1361	0.0084314	0.9257	0.0401
				18	2500.75	0.2169	0.0134	1.1429	0.0495
				17	3104.89	1.2367	0.032	3.4733	0.017
				16	3155.13	12.1781	0.3148	14.833	0.0728
				15	3155.34	2.2148	0.0572	5.9044	0.029
				14	3205.05	5.514	0.4311	10.5054	0.4466
				13	3205.4	10.0476	0.7856	18.7921	0.7989
				12	3255.44	13.3556	1.0443	20.1414	0.8563
				11	3305.45	22.2421	1.7391	22.3244	0.9491
				10	3354.67	36.2718	2.8361	18.8088	0.7996
				9	3355.25	0.7923	0.0619	3.4042	0.1447
				8	3405.71	26.7101	2.0885	23.2833	0.9899
				7	3456.67	25.094	0.6486	27.348	0.1342
				6	3457.04	24.1401	0.624	19.1411	0.0939
				5	3505.39	17.7587	0.459	18.6075	0.0913
				4	3555.45	2.4644	0.0637	7.7568	0.0381
				3	3605.79	0.5527	0.0143	2.575	0.0126
				2	3657	1.2121	0.0313	2.5806	0.0127
				1	3657.05	0.2285	0.0059048	1.3057	0.0064058
HERMINE	5	315.17	26.1292	24	30.495	1.4949	0.0331	0.6971	0.0068829
				23	120.919	1.3973	0.0309	0.8724	0.0086139
				22	501.442	0.1698	0.0037565	0.6969	0.0068813
				21	1002.62	0.00127	2.8103e-05	0.7374	0.0072811
				20	1252.46	0.1478	0.0032703	0.7343	0.00725
				19	2504.15	0.2391	0.0052904	1.0981	0.0108
				18	3008.39	0.8109	0.021	3.102	0.0152
				17	3155.38	1.7174	0.0444	4.6149	0.0226
				16	3202.98	2.2055	0.057	6.1341	0.0301
				15	3204.55	16.4618	0.4255	14.1093	0.0692
				14	3255.93	28.8753	0.7463	14.8276	0.0727
				13	3304.63	21.3932	0.553	14.4027	0.0707
				12	3305.19	23.3331	0.6031	11.909	0.0584
				11	3355.95	25.3042	0.654	27.4352	0.1346
				10	3404.1	29.2788	0.7568	28.3888	0.1393
				9	3404.81	28.923	0.7476	32.2992	0.1585
				8	3455.36	24.606	0.636	25.3097	0.1242
				7	3506.2	7.99	0.2065	21.1953	0.104
				6	3555.63	4.4756	0.1157	14.9685	0.0734
				5	3605.66	0.3356	0.0086743	1.8686	0.009167
				4	3605.92	0.4194	0.0108	2.1983	0.0108
				3	3653.33	0.1978	0.0051118	1.0901	0.0053481
				2	3686.58	0.3134	0.0080992	1.3983	0.0068598
				1	3687.07	0.1882	0.0048647	1.1234	0.0055112
HERMINE	6	315.17	26.1392	24	30.029	1.2748	0.0329	0.7675	0.0037655
				23	151.027	1.2338	0.0319	0.8847	0.0043404
				22	451.003	0.1727	0.0044625	0.6453	0.0031656
				21	1002.12	0.1296	0.0033498	0.8296	0.0040698
				20	1252.54	0.1723	0.0044522	1.6315	0.008004
				19	2504.39	0.2074	0.0053617	1.0732	0.0052653
				18	3005.76	0.6264	0.0162	2.8103	0.0138
				17	3104.18	8.2968	0.2144	13.3563	0.0655
				16	3155.65	6.1261	0.1583	11.4443	0.0561
				15	3205.45	23.5171	0.6078	18.0405	0.0885
				14	3254.26	27.9506	0.7224	17.3074	0.0849
				13	3254.87	27.0856	0.7001	16.9129	0.083
				12	3305.41	34.1977	0.8839	14.9068	0.0731
				10	3356	23.3834	0.6044	19.7516	0.0969
				11	3356.03	20.9291	0.541	21.3101	0.1045
				9	3405.86	23.587	0.6097	24.4427	0.1199
				8	3454.89	15.8711	0.4102	29.8218	0.1463
				7	3455.49	15.8584	0.4099	32.2426	0.1582
				6	3505.81	2.0003	0.0517	7.4697	0.0366
				5	3555.69	0.7153	0.0185	4.6974	0.023
				4	3606.24	0.2506	0.006477	1.3427	0.0065874
				3	3655.83	0.1866	0.0048231	1.0551	0.0051765
				1	3673.82	0.1802	0.0046582	1.2299	0.006034
				2	3673.91	0.1888	0.0048786	1.0732	0.0052649
HERMINE	7	315.165	26.1214	24	30.695	1.4397	0.0319	0.6092	0.0060151
				23	109.444	1.3626	0.0302	0.5984	0.0059079
				22	250.971	0.2637	0.0058345	0.4594	0.0045355
				21	1002	0.1399	0.0030955	0.6777	0.0066911
				20	1252.46	0.1456	0.0032225	0.6539	0.0064564
				19	2653.7	0.1698	0.0037563	0.685	0.0067636
				18	2804.33	0.2104	0.0046553	0.8289	0.008184
				17	2904.12	0.4027	0.0104	2.2225	0.0109
				16	3005.45	0.8049	0.0208	3.7784	0.0185
				15	3104.8	1.2031	0.0311	2.9428	0.0144
				14	3204.88	1.6471	0.0426	3.3991	0.0167
				13	3205.15	1.778	0.046	3.4622	0.017
				12	3255.36	1.6649	0.043	2.567	0.0126
				11	3280.76	2.2773	0.0589	3.029	0.0149
				10	3305.37	39.896	1.0312	7.7575	0.0381
				9	3305.66	9.1475	0.2364	7.8215	0.0384
				8	3330.68	9.1475	0.2364	25.2719	0.124
				7	3354.83	5.1436	0.1329	4.379	0.0215
				6	3355.37	5.0672	0.131	20.4545	0.1003
				5	3380.95	1.8795	0.0486	2.8347	0.0139
				4	3455.61
				3	3604.76	0.1912	0.0049412	1.5236	0.0074748
				2	3805.87	0.3544	0.00916	1.1188	0.0054889
				1	3865.82	0.1626	0.0042025	1.0306	0.005056
HERMINE	8	315.151	26.098	24	29.728	1.4384	0.0318	0.6139	0.0060618
				23	131.013	1.2453	0.0276	0.5347	0.005279
				22	1001.71	0.1382	0.0030579	0.6463	0.006381
				21	1252.54	0.1519	0.0033617	0.6944	0.0068564
				20	2603.82	0.1562	0.0034555	0.889	0.008778
				19	2804.59	0.5174	0.0114	1.7175	0.017
				18	2955.11	0.8911	0.0552	3.0642	0.1326
				17	3105	1.214	0.0752	3.1989	0.1385
				16	3205.02	1.3899	0.0861	2.7608	0.1195
				15	3230.39	2.2559	0.1398	3.758	0.1627
				14	3249.25	3.6192	0.2243	5.04	0.2182
				13	3255.64	3.2456	0.2011	3.9903	0.1727
				12	3280	3.6554	0.2265	3.9676	0.1717
				11	3305.6
				10	3305.69	3.5142	0.2178	112.514	4.8701
				9	3330.53	3.0386	0.1883	3.5944	0.1556
				8	3352.9	0.7502	0.0465	1.6614	0.0719
				7	3355.55	0.777	0.0481	1.7792	0.077
				6	3380.19	0.4125	0.0256	1.3141	0.0569
				5	3405.73	0.5211	0.0323	1.2381	0.0536
				4	3505.88	0.4739	0.0294	1.2842	0.0556
				3	3705.01	0.3022	0.0187	1.0008	0.0433
				2	3905.5	0.4633	0.0287	1.276	0.0552
				1	3979.05	0.3338	0.0207	1.298	0.0562
HERMINE	9	315.128	26.0587	24	30.246	1.5412	0.0341	0.682	0.0067335
				23	250.649	0.2485	0.005498	0.4521	0.0044641
				22	1002.33	0.00056	1.2392e-05	0.00966	9.5379e-05
				21	1252.49	0.1541	0.0034104	0.8611	0.0085024
				20	2001.38	0.1619	0.0035828	0.6647	0.0065627
				19	2804.89	0.1579	0.0034936	0.6976	0.0068873
				18	3005.42	0.2156	0.0047702	0.8683	0.0085737
				17	3104.36	0.227	0.0050224	1.4659	0.0145
				16	3154.7	0.4697	0.0104	1.4059	0.0139
				15	3180.31	0.6991	0.0433	1.5531	0.0672
				14
				13	3205.26	1.347	0.0835	2.0924	0.0906
				12	3205.41	1.4464	0.0896	2.212	0.0957
				11	3229.54	1.5077	0.0934	2.0314	0.0879
				10	3229.91	1.5417	0.0955	2.046	0.0886
				9	3255.42	0.6244	0.0387	1.3847	0.0599
				8	3305.36	0.4617	0.0286	1.2115	0.0524
				7	3405.67	0.4142	0.0257	1.2349	0.0535
				6	3605.71	0.3683	0.0228	1.2642	0.0547
				5	3805.61	0.3268	0.0203	0.986	0.0427
				4	4006.07	0.3424	0.0212	1.4152	0.0613
				3	4206.62	0.3255	0.0202	0.966	0.0418
				2	4289.85	0.3345	0.0207	1.0657	0.0461
				1	4289.85	0.379	0.0235	0.9838	0.0426
HERMINE	10	315.036	25.9018	24	20.292	0.00346	7.6564e-05	0.0875	0.00086394
				23	250.939	0.2189	0.0048443	0.4027	0.0039762
				22	1001.68	0.1223	0.0027063	0.5985	0.0059094
				21	1249.08	0.1448	0.0032046	0.6746	0.0066606
				20	2004.27	0.165	0.0036507	0.6998	0.0069094
				19	2608.39	0.2179	0.0048213	1.0863	0.0107
				18	2704.27	0.3511	0.0077699	1.1677	0.0115
				17	2804.6	0.3766	0.0083339	1.2635	0.0125
				16	2804.86	0.3815	0.0084417	1.3051	0.0129
				15	2903.91	0.4119	0.0091135	1.3523	0.0134
				14	3004.62	0.4111	0.009096	1.3514	0.0133
				13	3103.72	0.5533	0.0122	1.4346	0.0142
				12	3154.74	0.6985	0.0155	1.5302	0.0151
				11	3181.14	0.4924	0.0109	1.2634	0.0125
				10	3204.54	0.5591	0.0124	1.4544	0.0144
				9	3205.07	0.5114	0.0113	1.4283	0.0141
				8	3229.63	0.4974	0.011	1.24	0.0122
				7	3255.4	0.5921	0.0131	1.3345	0.0132
				6	3305.81	0.4889	0.0108	1.1926	0.0118
				5	3405.54	0.4756	0.0105	1.1519	0.0114
				4	3605.41	0.4935	0.0109	1.2071	0.0119
				3	3605.65
				1	3665.4	0.5091	0.0113	1.1539	0.0114
				2	3666.06	0.5024	0.0111	1.2702	0.0125
